# Supplementary material for: Oxidative Stress in Rats is Modulated by Seasonal Consumption of Sweet Cherries from Different Geographical Origins: Local vs. Non-Local
Source: PubMed Central journal article supplement (PMC7551698; doi:10.3390/nu12092854), 2020-09-18
Supplement: nutrients-12-02854-s001.pdf [file nutrients-12-02854-s001.pdf]

**Supplementary Materials:** The following are available online at [www.mdpi.com/xxx/s1](http://www.mdpi.com/xxx/s1), Figure S1: Representative images of Brooks sweet cherries from two different geographical origins: (a) Local sweet cherry (LC) from Tarragona, Spain; (b) Non-local sweet cherry (NLC) from Cachapoal, Chile.

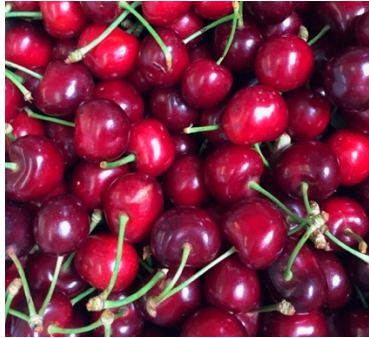

(a)

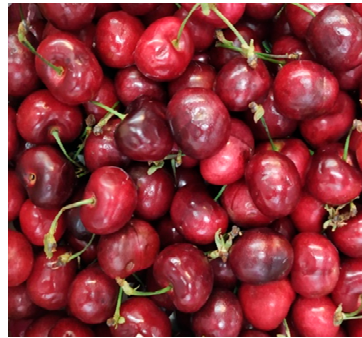

(b)

**Figure S1.** Representative images of Brooks sweet cherries from two different geographical origins: (a) Local sweet cherry (LC) from Tarragona, Spain; (b) Non-local sweet cherry (NLC) from Cachapoal, Chile.
